# Supplementary material for: Surfaces of Silver Birch ( Betula pendula ) are Sources of Biological IceNuclei: In-vivo and In-situ Investigations
Source: Copernicus journal article supplement (doi:10.5194/bg-2020-195), 2020-07-06
Supplement: Supplementary file 1 [file bg-2020-195-supplement.pdf]

## Supplementary

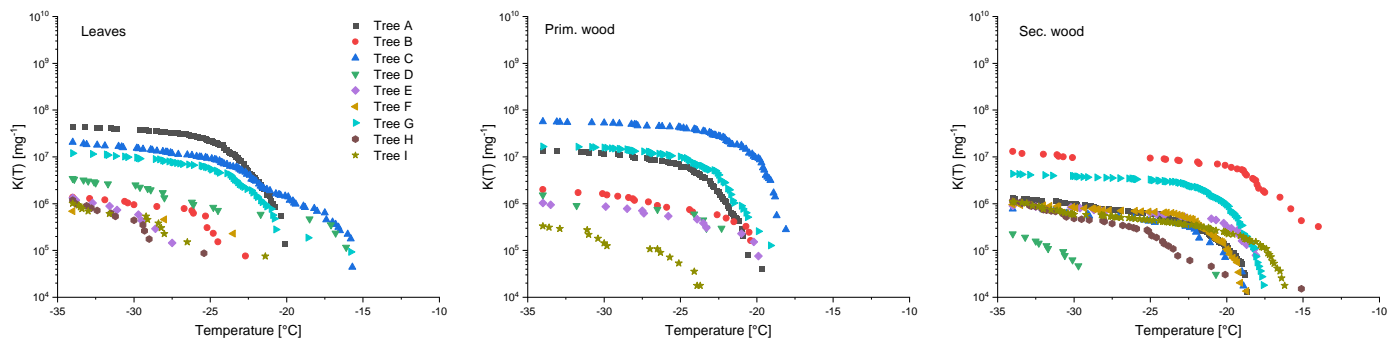

**Figure 7:** Cumulative nucleus concentration  $K(T)$  of extracted INMs from the surface of leaves, primary and secondary wood.  $K(T)$  describes the number of INMs extracted per mg samples. Samples originate from nine different birches in Tyrol (Tree A to I).
